# Supplementary material for: Genome-wide analysis of the HbWOX gene family and HbWOX14-mediated enhancement of hairy root transformation in Hevea brasiliensis
Source: Research Square preprint supplement (doi:10.21203/rs.3.rs-8197958/v1), 2025-12-03
Supplement: Supplementary file 1 [file 76c89abf1e2638924275fbc9.xlsx]

## Sheet: Sheet1
Table S1 The primers used in this study.
Gene name	Forward primer (5'-3')
The primers for transgenic plant
PRI01: GFP-HbWOX14-F	GGTTAGGGGTGAAGGTGATG
PRI01: GFP-HbWOX14-R	GGACCACAGTAAGGATTCCC
PRI101-GFP-F:	ATGGTGAGCAAGGGCGAGGAG
PRI101-GFP -R:	TTACTTGTACAGCTCGTCCATG
The qRT-PCR primers for gene expression analysis
HbWOX3.1-qPCR-F	TGTCCCCTGCTACTTCCTCT
HbWOX3.1-qPCR-R	GAGGTGGGCGGTGATTCTTT
HbWOX2.1-qPCR-F	CAAATGGCGTTGTTTGTGGC
HbWOX2.1-qPCR-R	TTAGCTCCCTGCTGTTTCCT
HbWOX4.2-qPCR-F	AAACTCCCAATGCCCAGGAA
HbWOX4.2-qPCR-R	ATAGTGGTAATGGGGCCTGG
HbWOX1.1-qPCR-F	CAAGGCAAGAGAACGGCAAA
HbWOX1.1-qPCR-R	GTTGTCCTACTTGCCCCTGA
HbWOX11-qPCR-F	GGTTCTGGTGGTGGTAGCTC
HbWOX11-qPCR-R	CACCATCCCCATGACCAACA
HbWOX8.3-qPCR-F	TTAGTTGCCCTGTCACGACT
HbWOX8.3-qPCR-R	CGCCTTGAATTTGGCGGATA
HbWOX6.1-qPCR-F	GACAAAAACGCCGTCGTGAA
HbWOX6.1-qPCR-R	GGATGAACACACAGACCTCCA
HbWOX3.2-qPCR-F	CACCCATGGAAGGTGGAGAT
HbWOX3.2-qPCR-R	GTGGTCTTGTGTTGCTGCTG
HbWOX13-qPCR-F	TGTTGTGTGCTATGGTTGTGA
HbWOX13-qPCR-R	GCTTGGAGTTCCATTCCCCA
HbWOX14-qPCR-F	GGTTAGGGGTGAAGGTGATG
HbWOX14-qPCR-R	GGACCACAGTAAGGATTCCC
HbWOX4.1-qPCR-F	CGACTTGGCTCTGTGTTGGA
HbWOX4.1-qPCR-R	CCAGTGATCGAAGGGTGGTC
HbWOX5.1-qPCR-F	ACAAGCACCCCAACGTTACT
HbWOX5.1-qPCR-R	CCACTGTTGGCACTAGCTGA
HbWOX1.2-qPCR-F	CACAAAGCAAGAGAACGGCAA
HbWOX1.2-qPCR-R	ACCTGTCCTGTTAGCTTCTGATT
HbWOX6.2-qPCR-F	AGAACGCCATCAGCAGAACA
HbWOX6.2-qPCR-R	GCTTCAAGATCCTGGCTTCCA
HbWOX6.3-qPCR-F	CGTCGTGCGGGAAAGTTTG
HbWOX6.3-qPCR-R	TCACTGCAGCTTGAAGGAGG
HbWOX8.2-qPCR-F	GCAGCACGACGTCAACCC
HbWOX8.2-qPCR-R	ATGCGAATTTGCTCAGGCTTT
HbWOX8.1-qPCR-F	TTCAAGCACGCAGTGAGTTA
HbWOX8.1-qPCR-R	CGACTCTCCTGCACTGTATT
rna-gnl|WGS:JAAGAX|GT031829.t1-qPCR-F	AGAATGACCTTACAGCGAACAAA
rna-gnl|WGS:JAAGAX|GT031829.t1-qPCR-R	TTGCATTGTTCATTGCCGGTT
rna-gnl|WGS:JAAGAX|GT005901.t2-qPCR-F	TGGAAACTTGGGGAGAGGAAG
rna-gnl|WGS:JAAGAX|GT005901.t2-qPCR-R	GGTGCTTTTGACCCCTCAAG
rna-gnl|WGS:JAAGAX|GT014369.t3-qPCR-F	CGCATTGTGAAGGGTCCAGA
rna-gnl|WGS:JAAGAX|GT014369.t3-qPCR-R	AGGTCCCACATAAAGCAGCC
rna-gnl|WGS:JAAGAX|GT037945.t4-qPCR-F	TGTAAAGTCAACGGCGGCTA
rna-gnl|WGS:JAAGAX|GT037945.t4-qPCR-R	TTTCTCCTAACACCACCGCC
rna-gnl|WGS:JAAGAX|GT037961.t5-qPCR-F	ACGGGTCCAATCTCTTGAAACT
rna-gnl|WGS:JAAGAX|GT037961.t5-qPCR-R	CGCTAACTTGACAGAAACCTGC
rna-gnl|WGS:JAAGAX|GT005774.t6-qPCR-F	CGTTTGAGGGAGGCCAAGAT
rna-gnl|WGS:JAAGAX|GT005774.t6-qPCR-R	AAGATCTGCATCCCTCCCCT
rna-gnl|WGS:JAAGAX|GT005678.t7-qPCR-F	GCAGCTGTTCTTGTACCAAGTT
rna-gnl|WGS:JAAGAX|GT005678.t7-qPCR-R	CCGCATAGGATTCCAGCTCC
rna-gnl|WGS:JAAGAX|GT005626.t8-qPCR-F	AGCCTGCGCATTAGAGCATA
rna-gnl|WGS:JAAGAX|GT005626.t8-qPCR-R	CTGTTGCTTTGTGGAGCCC
rna-gnl|WGS:JAAGAX|GT033271.t9-qPCR-F	TGGGATCACCGAGTGAGGAT
rna-gnl|WGS:JAAGAX|GT033271.t9-qPCR-R	GTGTCTTCTGAGGCAGAGGC
rna-gnl|WGS:JAAGAX|GT033467.t10-qPCR-F	TTGCCGACTTATCGGGTGAG
rna-gnl|WGS:JAAGAX|GT033467.t10-qPCR-R	GGACCCACAGCAACTTCCTT
rna-gnl|WGS:JAAGAX|GT024700.t11-qPCR-F	CGCTCCCATCAAGGATGTCA
rna-gnl|WGS:JAAGAX|GT024700.t11-qPCR-R	TGCCAATGCAAGTAACCCCT
rna-gnl|WGS:JAAGAX|GT025859.t12-qPCR-F	CGGCTCCGCCCATTATTTCT
rna-gnl|WGS:JAAGAX|GT025859.t12-qPCR-R	CTTGATGACTTGCCGCATGG
rna-gnl|WGS:JAAGAX|GT024783.t13-qPCR-F	AAGCAACGGCCTCATCTCTC
rna-gnl|WGS:JAAGAX|GT024783.t13-qPCR-R	CCGGTACACCTTCTGCAACT
rna-gnl|WGS:JAAGAX|GT012677.t14-qPCR-F	GACTAGGAGCGGGGGTTAGT
rna-gnl|WGS:JAAGAX|GT012677.t14-qPCR-R	CCTTCCCTTTTCTCCCCATCAA
rna-gnl|WGS:JAAGAX|GT036256.t15-qPCR-F	AGGTGATTCTGGTTGGCGAG
rna-gnl|WGS:JAAGAX|GT036256.t15-qPCR-R	CGGGAAACACCTTCATGAGC
rna-gnl|WGS:JAAGAX|GT028564.t16-qPCR-F	TTGGTATTGTGCGTGTCCCA
rna-gnl|WGS:JAAGAX|GT028564.t16-qPCR-R	CGACATGGCCGACCAGAAA
rna-gnl|WGS:JAAGAX|GT001157.t17-qPCR-F	TACACCGACCAATCCAGCAG
rna-gnl|WGS:JAAGAX|GT001157.t17-qPCR-R	GGGATGGCTCCATATGACGG
rna-gnl|WGS:JAAGAX|GT001820.t18-qPCR-F	TGGGACCACGAGGAGATGAT
rna-gnl|WGS:JAAGAX|GT001820.t18-qPCR-R	GCCGATCAAACATGCGAACA
rna-gnl|WGS:JAAGAX|GT034650.t19-qPCR-F	CAGGGCAGGTAGTTGTCAGG
rna-gnl|WGS:JAAGAX|GT034650.t19-qPCR-R	TGGTAAAAGCCATGCCCACA
rna-gnl|WGS:JAAGAX|GT031916.t20-qPCR-F	CATGGCAATGGCTGCTGAAA
rna-gnl|WGS:JAAGAX|GT031916.t20-qPCR-R	CATGAGGAGCAGCATCCAGA

## Sheet: Sheet3
Table S2 Identification of members of the WOX gene family in rubber trees
Gene name in Hevea brasiliensis	Gene name in Arabidopsis thaliana	Identity（%）	Rename
Hb.023485.mRNA1	AtWOX1	38.81	HbWOX1.1
Hb.001079.mRNA1	AtWOX1	38.59	HbWOX1.2
Hb.013673.mRNA1	AtWOX2	44.04	HbWOX2
Hb.014315.mRNA1	AtWOX3	79.73	HbWOX3.1
Hb.004191.mRNA1	AtWOX3	43.37	HbWOX3.2
Hb.005765.mRNA1	AtWOX4	67.09	HbWOX4.1
Hb013429.mRNA1	AtWOX4	52.16	HbWOX4.2
Hb.035777mRNA1	AtWOX5	65.08	HbWOX5
Hb.006717.mRNA1	AtWOX6	80	HbWOX6.1
Hb.043524.mRNA1	AtWOX6	76.36	HbWOX6.2
Hb.043512.mRNA1	AtWOX6	52.38	HbWOX6.3
Hb.016814.mRNA1	AtWOX8	80.31	HbWOX8.1
Hb.016772.mRNA1	AtWOX8	79.46	HbWOX8.2
Hb.003395.mRNA1	AtWOX8	46.67	HbWOX8.3
Hb.005281.mRNA1	AtWOX11	50.68	HbWOX11
Hb.036194.mRNA1	AtWOX13	60	HbWOX13
Hb.008017.mRNA1	AtWOX14	40	HbWOX14

## Sheet: Sheet4
Table S3 Analysis of the physicochemical properties of the HbWOX gene family members
Gene Name	ACC-NO-	AA	Molecular weight	pI	Aliphatic index	GRAVY
HbWOX1-1	Hb-023485-mRNA1	382	43240.1	6.68	58.04	-0.793
HbWOX1-2	Hb-001079-mRNA1	387	44044.1	8.78	57.78	-0.883
HbWOX2	Hb-013673-mRNA1	221	24895	9.32	62.26	-0.759
HbWOX3-1	Hb-014315-mRNA1	304	34370.3	4.64	72.43	-0.704
HbWOX3-2	Hb-004191-mRNA1	217	25143.6	9.01	62.03	-0.778
HbWOX4-1	Hb-005765-mRNA1	312	34597.2	9.45	75.93	-0.522
HbWOX4-2	Hb013429-mRNA1	209	23890	9.49	61.63	-1.007
HbWOX5	Hb-035777mRNA1	206	23166.6	9.68	41.65	-0.975
HbWOX6-1	Hb-006717-mRNA1	139	16269.8	9.58	77.12	-0.59
HbWOX6-2	Hb-043524-mRNA1	264	30520.2	9.08	57.99	-0.916
HbWOX6-3	Hb-043512-mRNA1	324	37133.6	8.98	57.81	-0.818
HbWOX8-1	Hb-016814-mRNA1	323	35834.9	8.78	62.69	-0.565
HbWOX8-2	Hb-016772-mRNA1	119	13922.5	8.52	49.92	-1.036
HbWOX8-3	Hb-003395-mRNA1	398	43828.8	8.18	64.85	-0.524
HbWOX11	Hb-005281-mRNA1	172	19642.3	9.97	65.12	-0.442
HbWOX13	Hb-036194-mRNA1	229	26340.6	6.25	71.48	-0.676
HbWOX14	Hb-008017-mRNA1	210	23849.8	5.49	69.67	-0.65

## Sheet: Sheet5
Table S4 Ka / Ks analysis of the HbWOX genes
Segmental duplication	Ka	Ks	Ka/Ks		Segmental duplication	Ka	Ks	Ka/Ks
HbWOX1.1/HbWOX1.2	0.0713	0.273	0.2613		HbWOX6.2/HbWOX6.3	0.0398	0.0478	0.833
HbWOX3.1/HbWOX3.2	0.1347	0.2467	0.5459		HbWOX8.1/HbWOX8.2	0.0403	0.0685	0.5873
HbWOX4.1/HbWOX4.2	0.1739	0.3919	0.4438		HbWOX8.2/HbWOX8.3	0.0876	0.2861	0.306
HbWOX6.1/HbWOX6.2	0.1767	0.3653	0.4837

## Sheet: Sheet2
Table S5 Types, resistance, and culture media of Agrobacterium rhizogenes
Agrobacterium strain	Resistance	medium
K599	Streptomycin	TY
LBA9402	Kanamycin	LB
