# Supplementary material for: Genome-wide analysis of the HbWOX gene family and HbWOX14-mediated enhancement of hairy root transformation in Hevea brasiliensis
Source: Research Square preprint supplement (doi:10.21203/rs.3.rs-8197958/v1), 2025-12-03
Supplement: Supplementary file 2 [file dd10fcd87e2c5858a452fd07.docx]

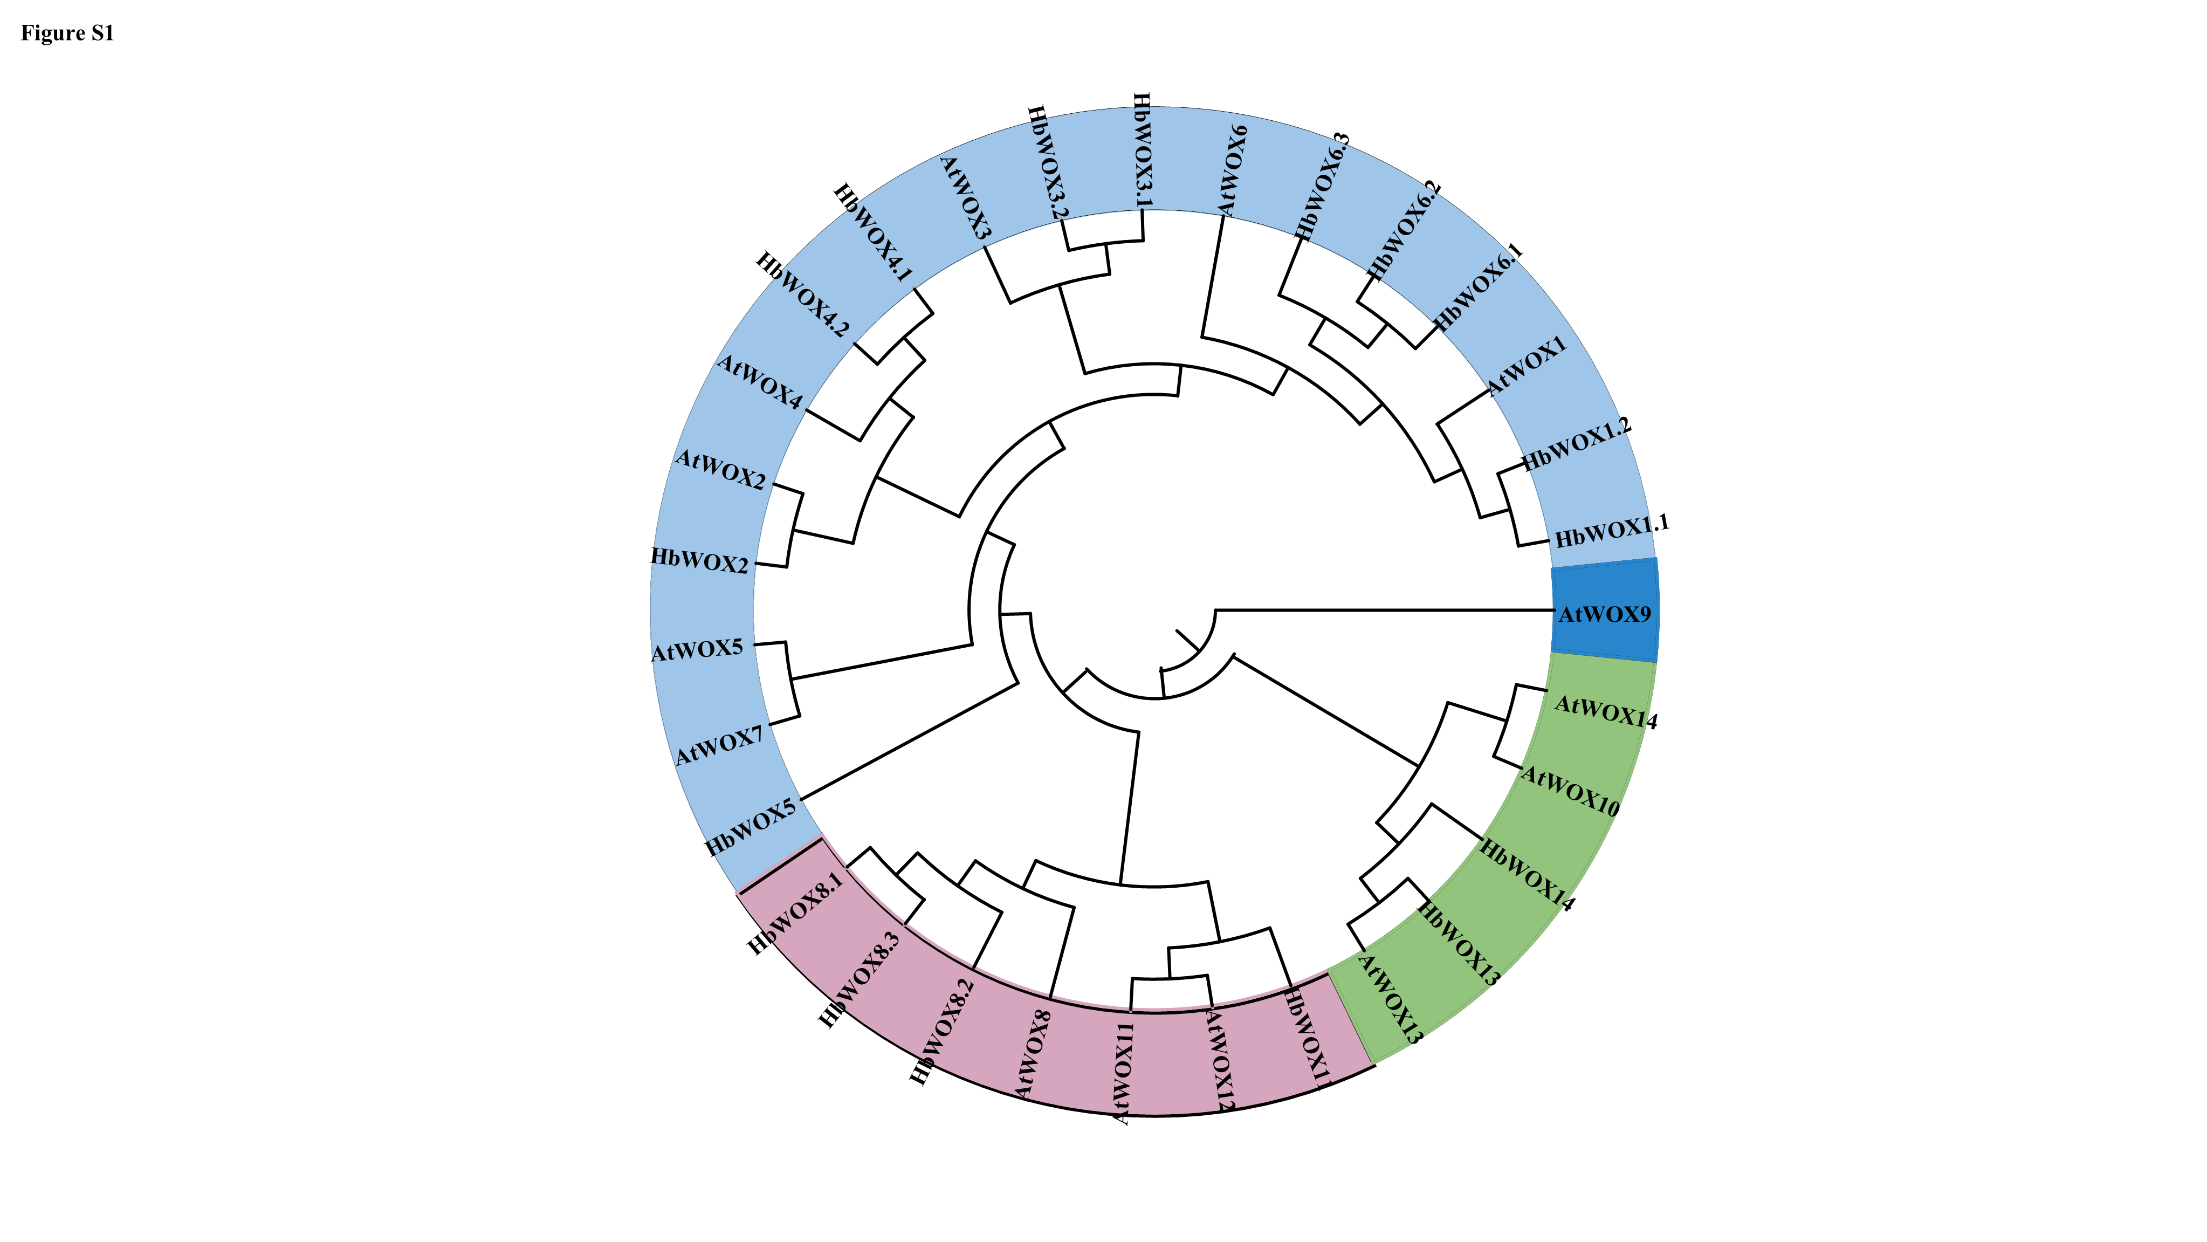


**Fig. S1. The evolutionary trees of the *HbWOX* and *AtWOX* gene families.** WOX

protein sequences were aligned using the MAFFT program and phylotree construction using the programs filtreebest and iTol programs.


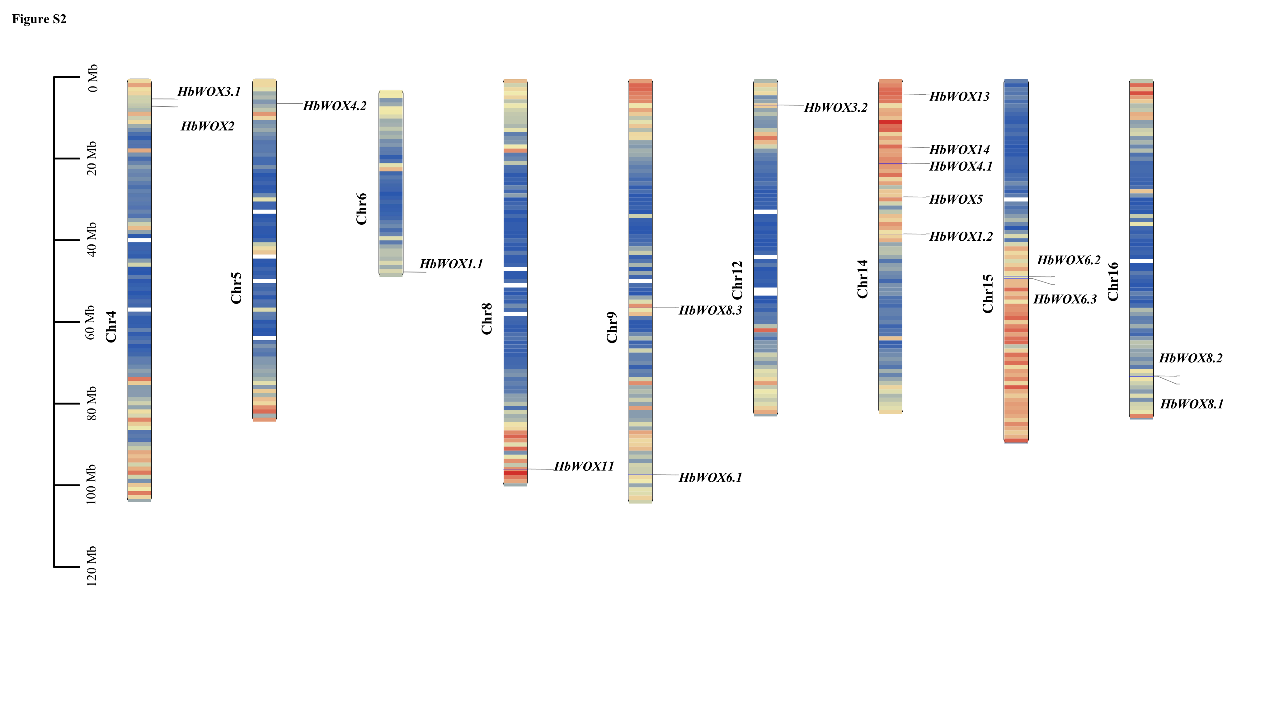


**Fig. S2. Chromosomal localization analysis of *HbWOX* genes in rubber tree.**


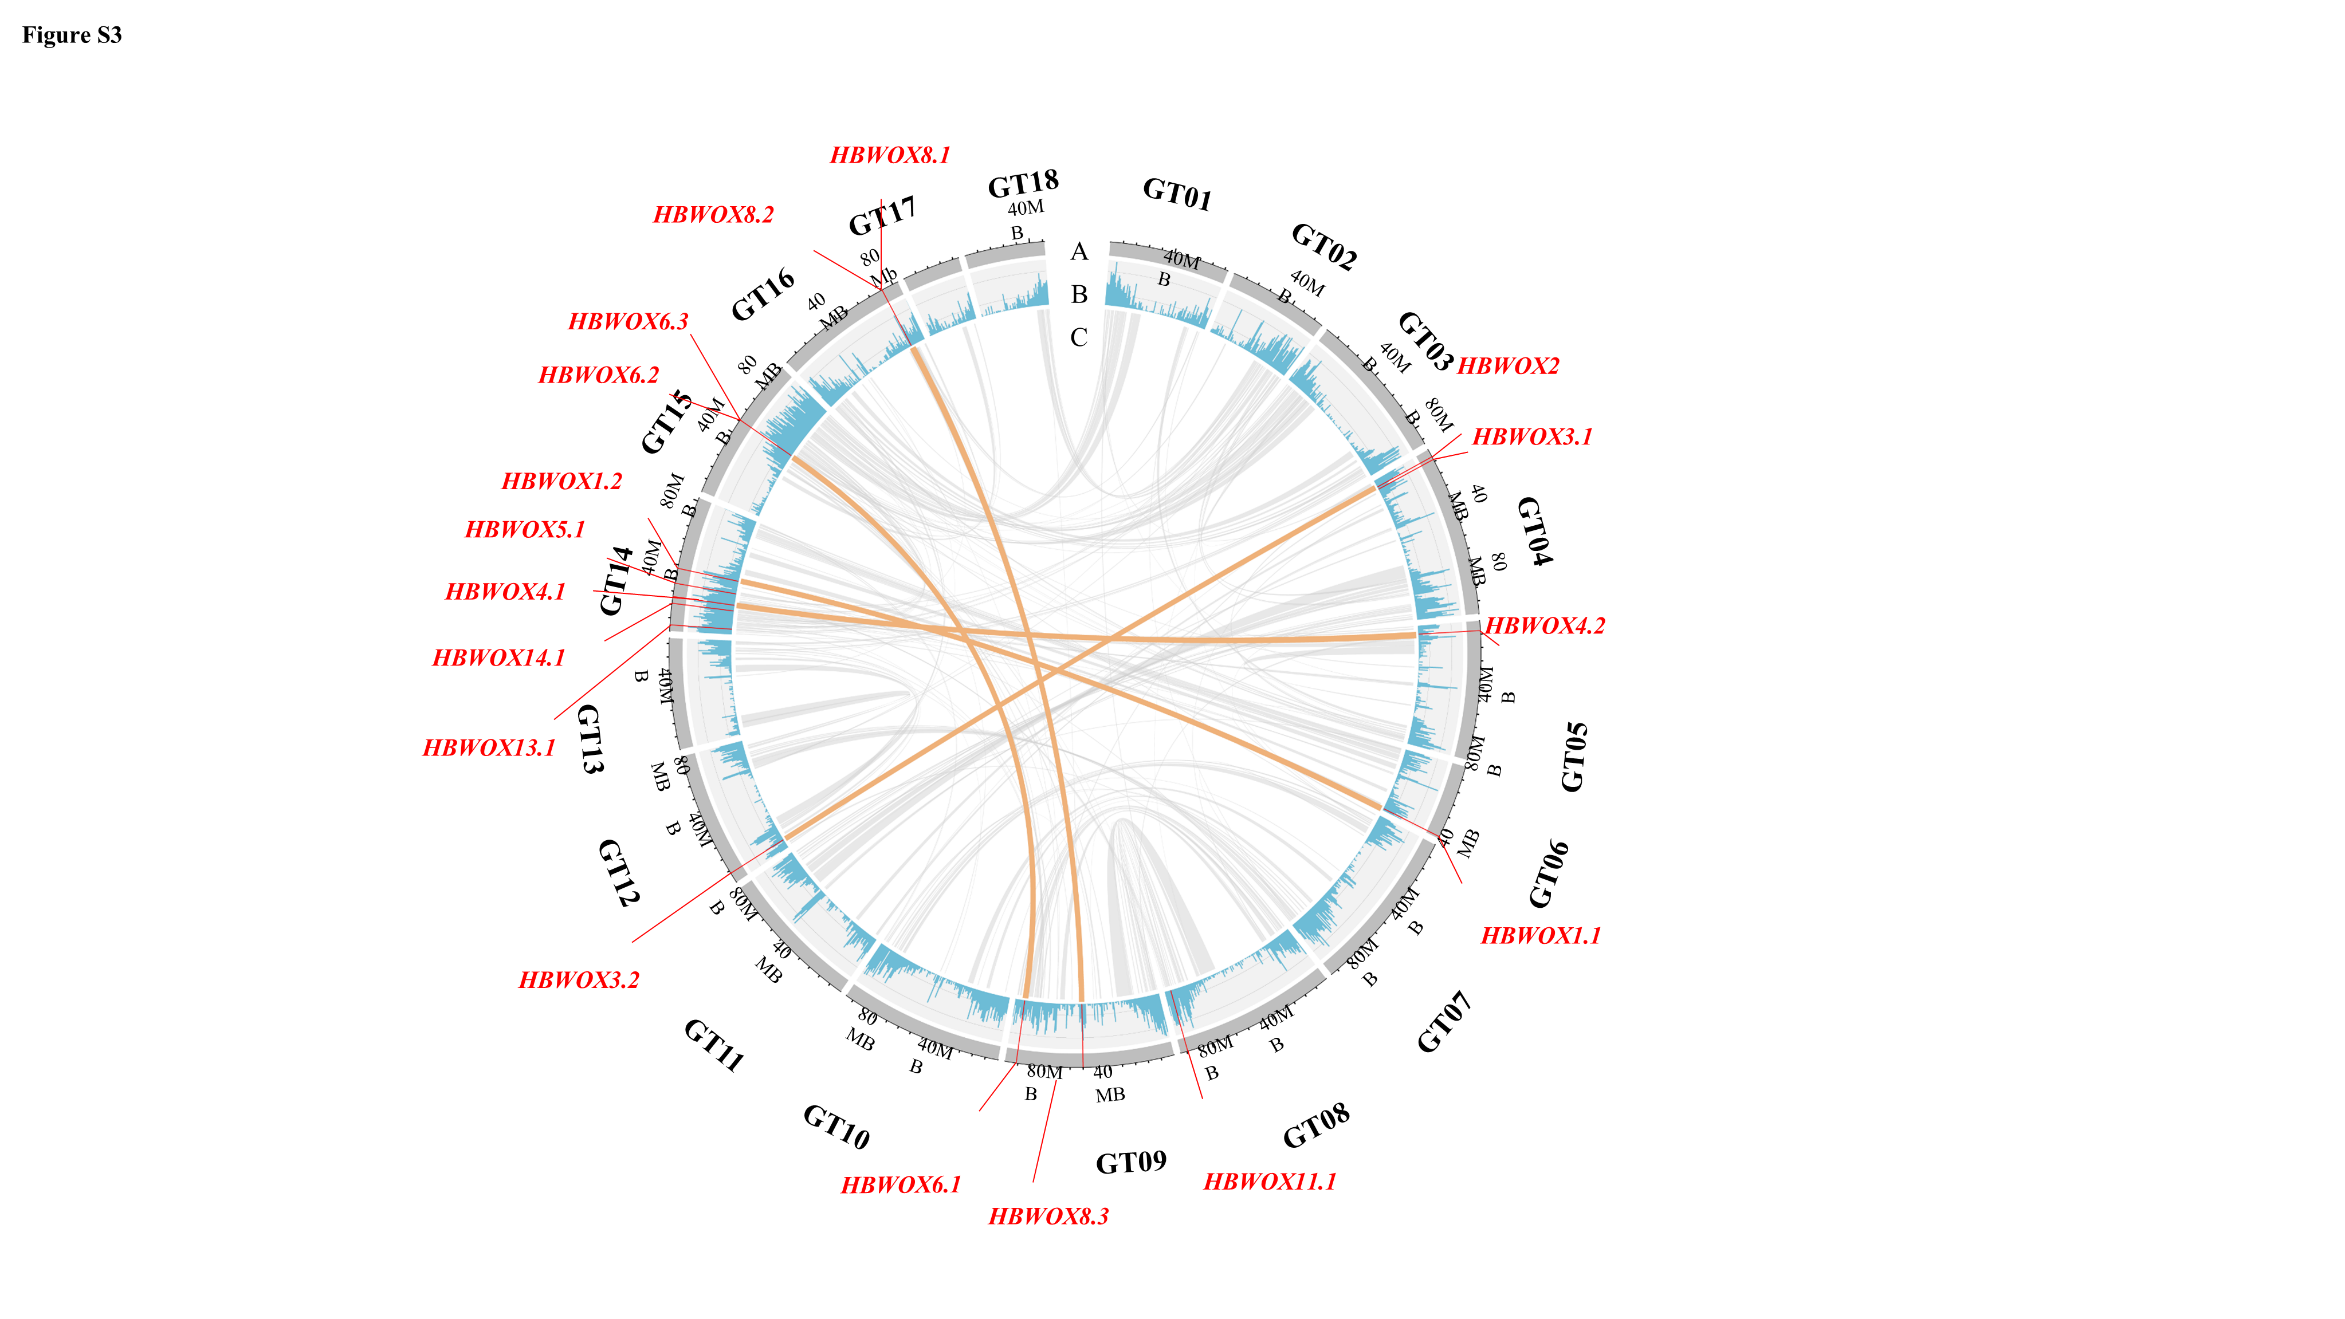


**Fig. S3. Synteny analysis of *HbWOX* genes in the genome of the rubber tree GT1 cultivar.**


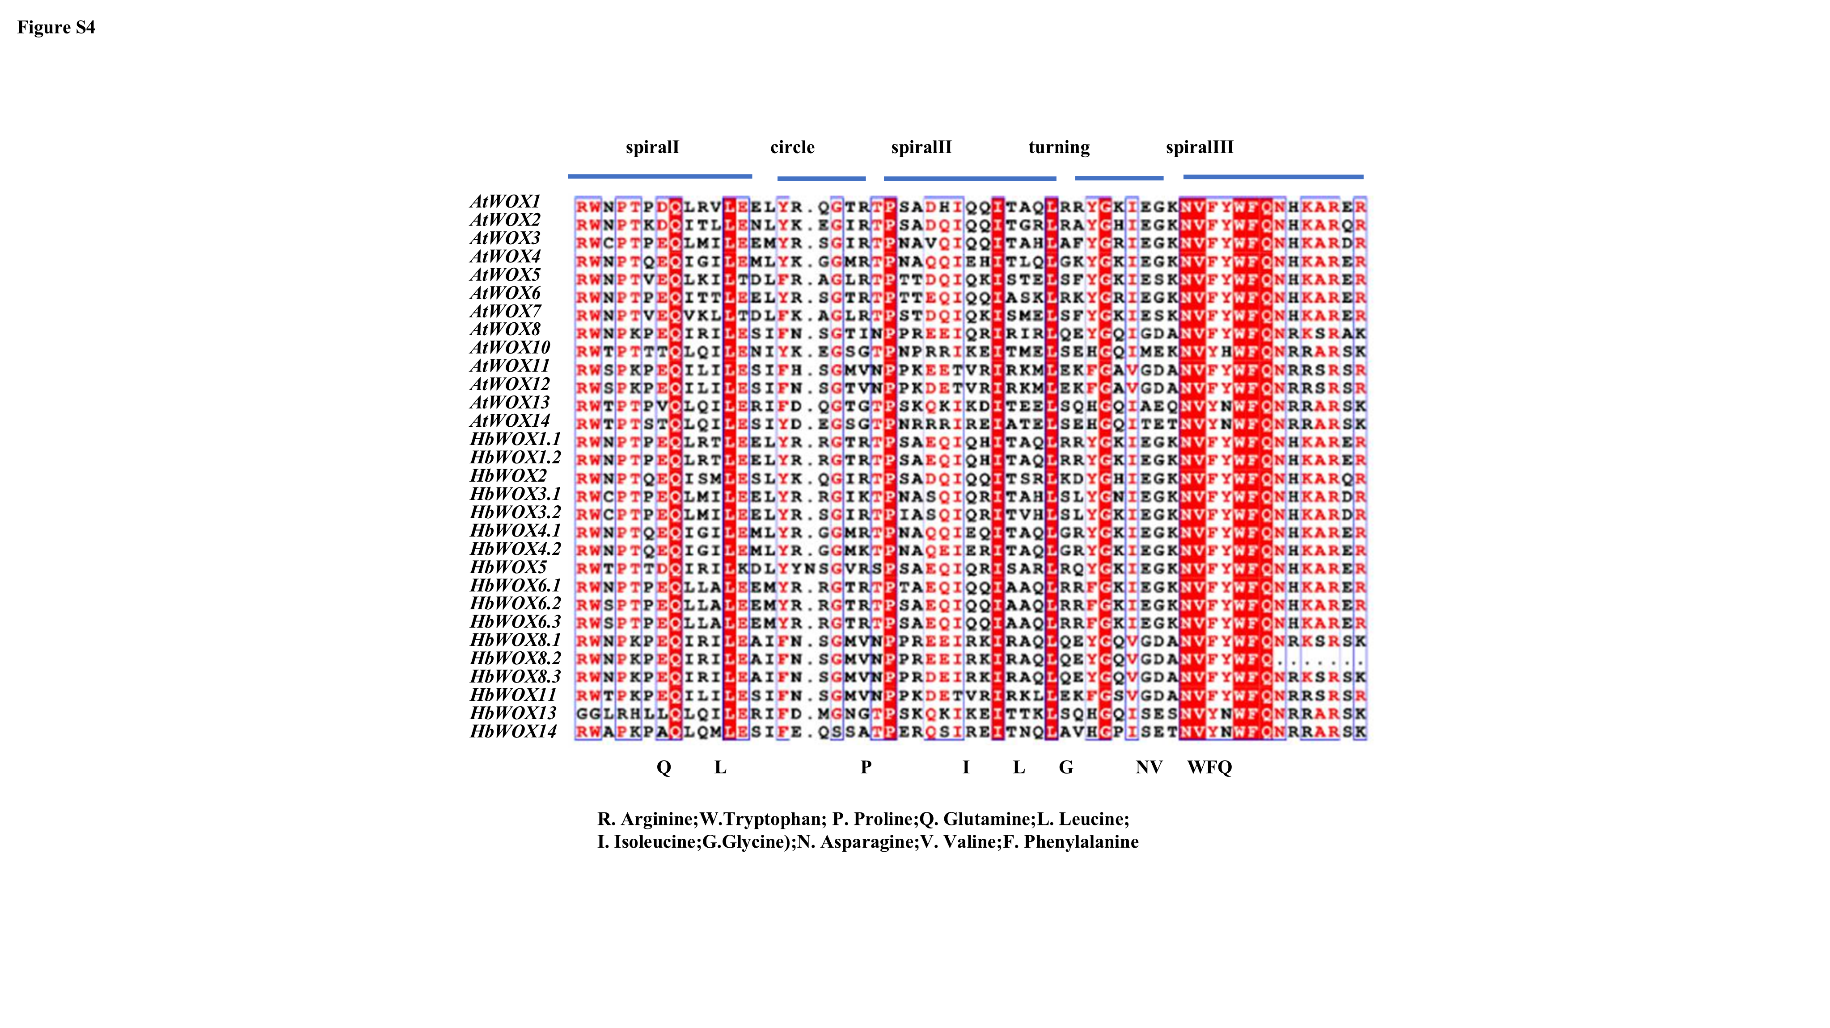


**Fig. S4. Sequence analysis of WOX proteins homeodomain in H. brasiliensis and A. thaliana.**


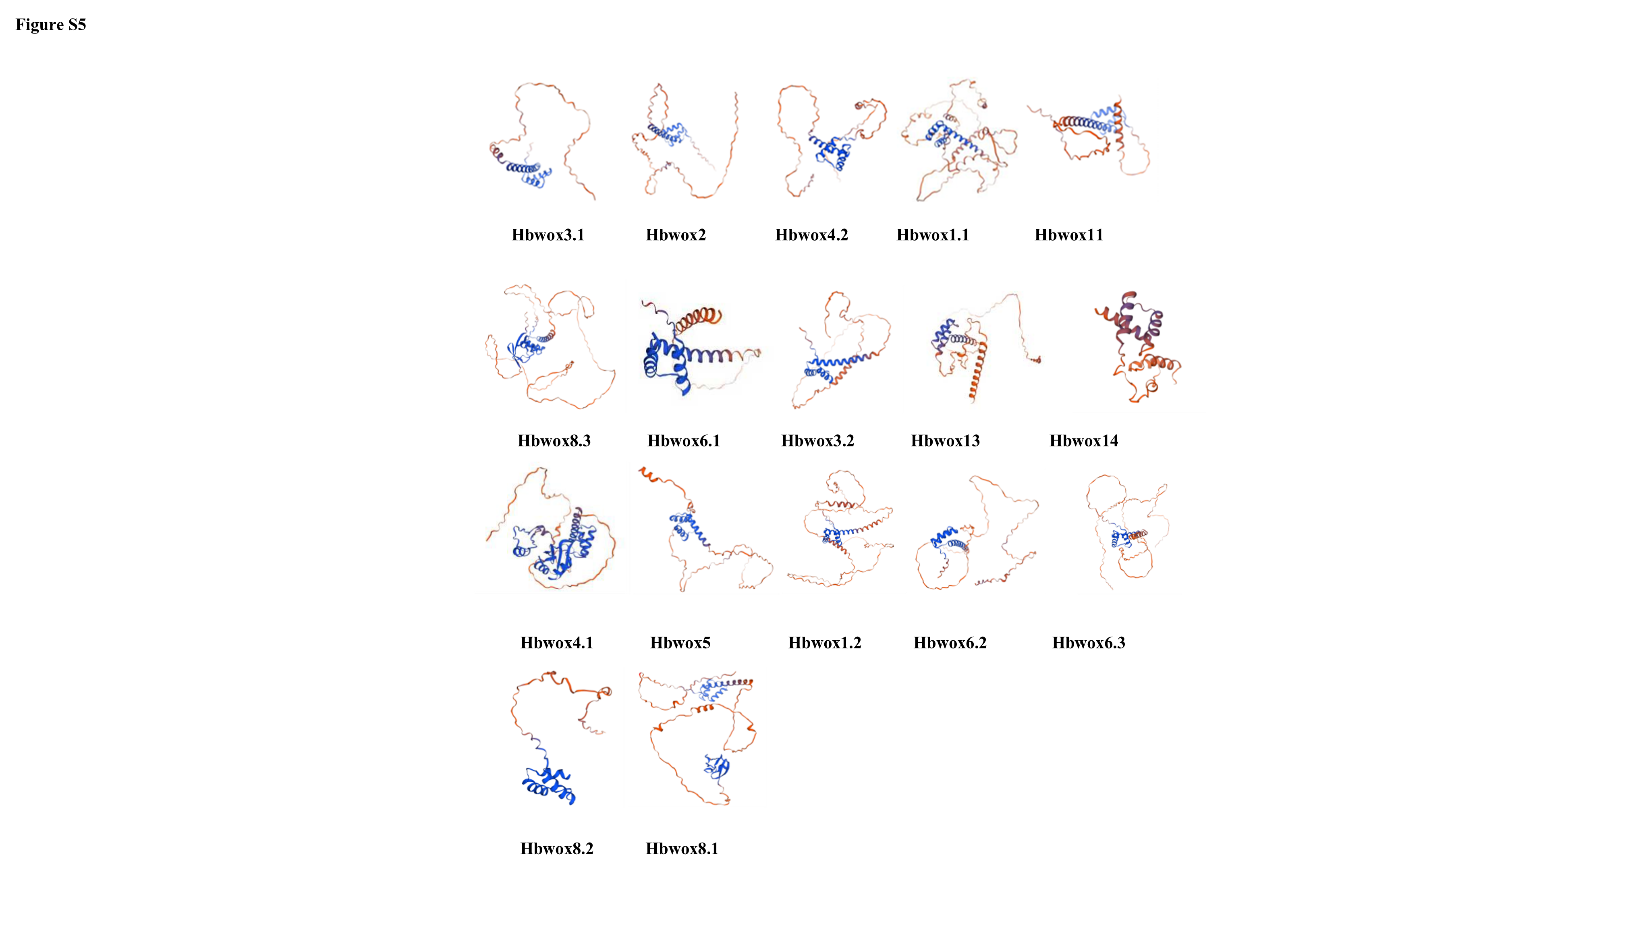


**Fig. S5. Three-dimensional structure analysis of the *WOX* gene family members in rubber tree.**


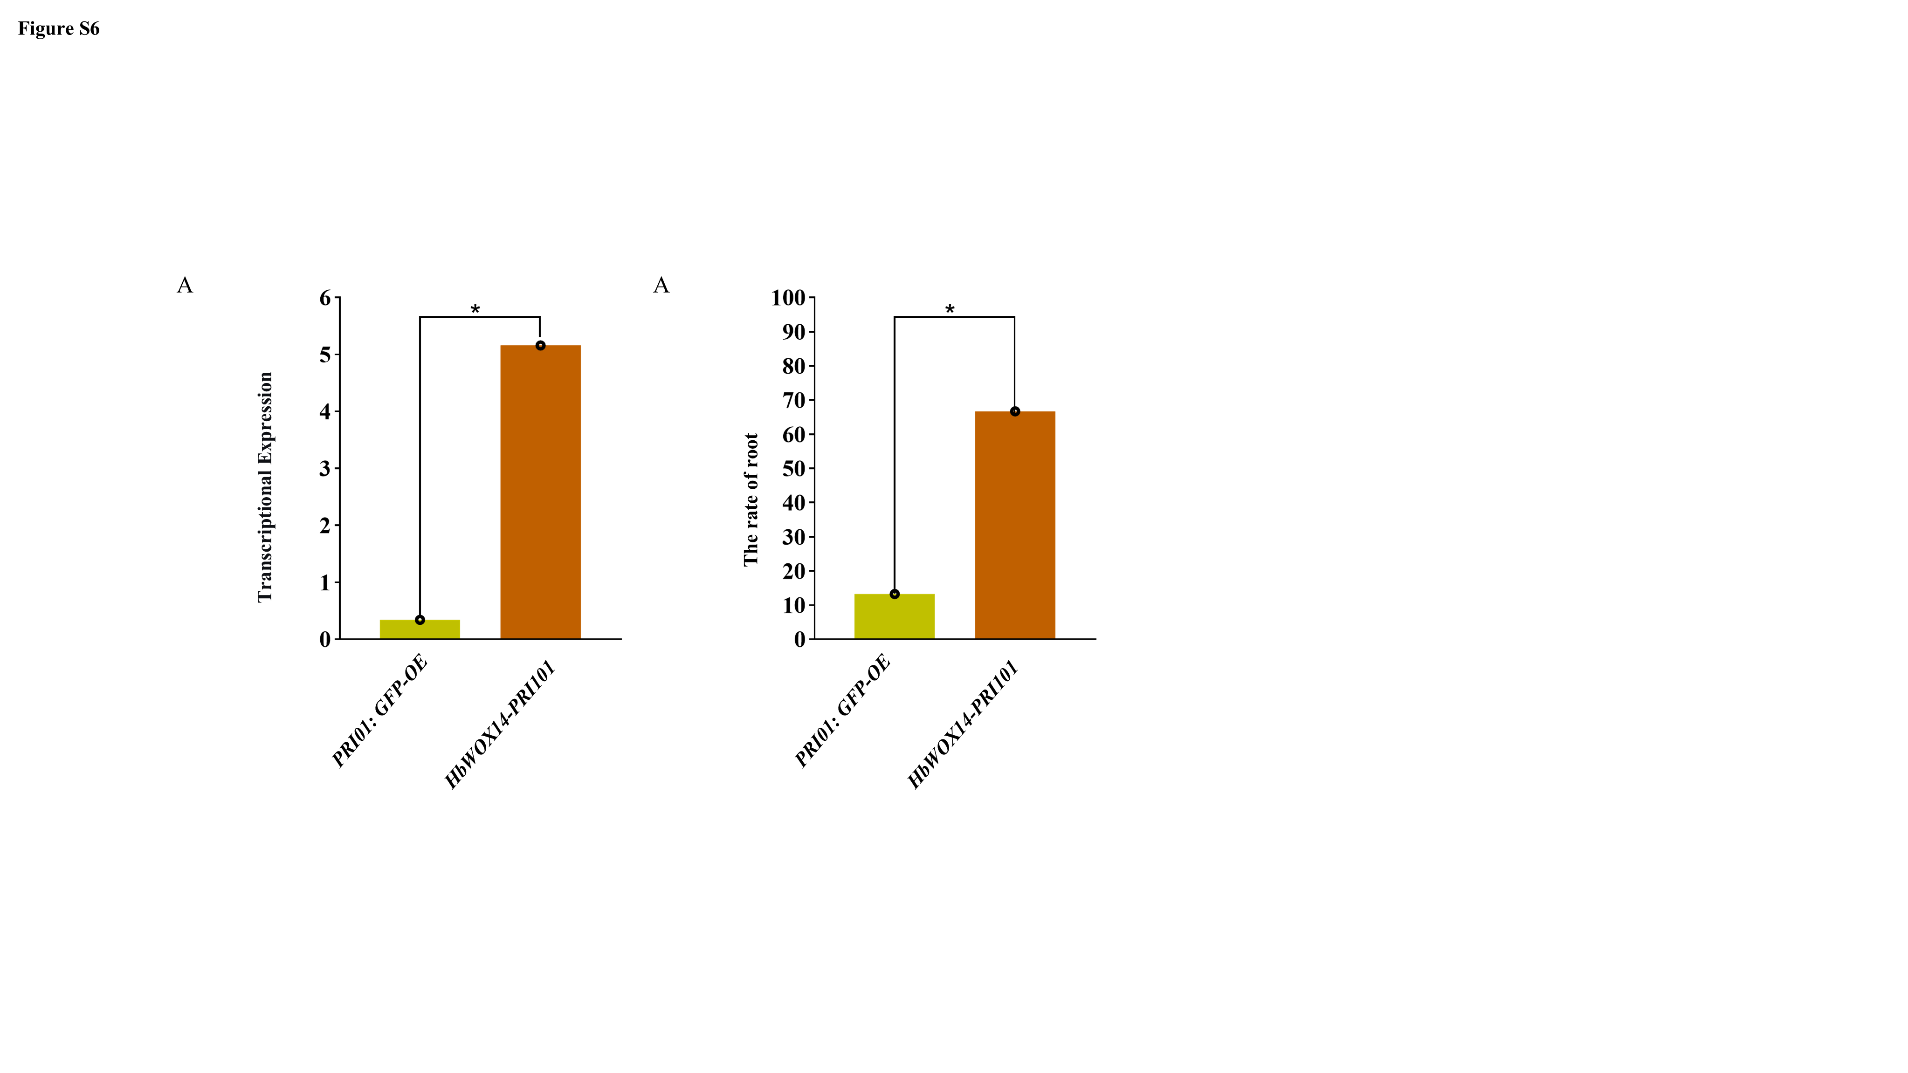


**Fig. S6. Comparison analysis of rooting rate and transcript level of *HBWOX14* between *PRI101: GFP-HbWOX14* and *PRI101: GFP* overexpressed lines**

(A) Statistics of rooting rate after overexpression of *PRI101: GFP-HbWOX14* and *PRI101: GFP*. (B) Transcriptome expression levels of *HbWOX14* in hairy roots induced after overexpression of *PRI101: GFP-HbWOX14* and *PRI101: GFP*. Data represent the mean ± SD, n=3. *, indicates p < 0.05.
